# Supplementary material for: Lymphovascular invasion, race, and the 21-gene recurrence score in early estrogen receptor-positive breast cancer
Source: PubMed Central journal article supplement (PMC7921089; doi:10.1038/s41523-021-00231-x), 2021-03-01
Supplement: 41523_2021_231_MOESM1_ESM.pdf [file 41523_2021_231_MOESM1_ESM.pdf]

Supplemental Table 1

Univariate analysis of association of clinicopathologic characteristics with OS

| Characteristic              | Number (%)     |             | P value |
|-----------------------------|----------------|-------------|---------|
|                             | Alive          | Dead        |         |
| Age (median) (IQR)          | 58 (50-65)     | 64 (57-70)  | <0.0001 |
| Race                        |                |             | <0.0001 |
| White                       | 65,514 (96.4%) | 2484 (3.6%) |         |
| Black                       | 5439 (94.6%)   | 311 (5.4%)  |         |
| Other                       | 3038 (98.1%)   | 58 (2.0%)   |         |
| Unknown                     | 564 (97.1%)    | 17 (2.9%)   |         |
| LVI                         |                |             | <0.0001 |
| Present                     | 9332 (94.7%)   | 524 (5.3%)  |         |
| Absent                      | 57,286 (96.6%) | 2019 (3.4%) |         |
| Unknown                     | 7937 (96.0%)   | 327 (4.0%)  |         |
| Tumor size (mm)             |                |             | <0.0001 |
| 0-20                        | 57,569 (96.9%) | 1827 (3.1%) |         |
| 21-50                       | 16,986 (94.2%) | 1043 (5.8%) |         |
| Lymph node involvement      |                |             | <0.0001 |
| 0                           | 62,789 (96.6%) | 2229 (3.4%) |         |
| 1-3*                        | 11,766 (94.8%) | 641 (5.2%)  |         |
| Grade                       |                |             | <0.0001 |
| 1                           | 20,430 (97.0%) | 639 (3.0%)  |         |
| 2                           | 38,839 (96.6%) | 1349 (3.4%) |         |
| 3                           | 11,322 (93.8%) | 755 (6.2%)  |         |
| Unknown                     | 3964 (97.0%)   | 127 (3.0%)  |         |
| Recurrence Score            |                |             | <0.0001 |
| 0-10                        | 16,883 (97.1%) | 507 (2.9%)  |         |
| 11-25                       | 46,865 (96.8%) | 1533 (3.2%) |         |
| 26-100                      | 10,807 (92.9%) | 830 (7.1%)  |         |
| Charlson-Deyo Comorbidities |                |             | <0.0001 |
| 0                           | 63,840 (98.9%) | 2066 (3.1%) |         |
| 1                           | 9149 (93.7%)   | 612 (6.3%)  |         |
| 2                           | 1292 (90.2%)   | 141 (9.8%)  |         |
| 3 or more                   | 274 (84.3%)    | 51 (15.7%)  |         |
| Median income quartile      |                |             | <0.0001 |
| <\$38,000                   | 8513 (94.6%)   | 488 (5.4%)  |         |
| \$38,000 - \$47,999         | 14,425 (95.7%) | 655 (4.3%)  |         |
| \$48,000 - \$62,999         | 20,237 (96.2%) | 791 (3.8%)  |         |
| >\$63,000                   | 31,214 (97.1%) | 932 (2.9%)  |         |
| Median educational level ** |                |             | <0.0001 |
| 1 (17.6% or more)           | 7832 (95.3%)   | 390 (4.7%)  |         |
| 2 (10.9% - 17.5%)           | 15,515 (95.6%) | 721 (4.4%)  |         |
| 3 (6.3% - 10.8%)            | 25,636 (96.2%) | 1000 (3.8%) |         |
| 4 (<6.3%)                   | 25,435 (97.1%) | 755 (2.9%)  |         |

\* includes micrometastatic nodal involvement

\*\*% of adults  $\geq$  age 25 in patients' zip code without high school diploma, expressed in quartiles

## Supplemental Table 2

Interaction between LVI and RS in node negative patients

(n=63470, number of deaths 2181)

|                                | HR    | 95% CI         | p-value |
|--------------------------------|-------|----------------|---------|
| LVI                            |       |                | 0.665   |
| Present vs. absent, RS 0-10    | 1.089 | (0.773, 1.532) |         |
| Present vs. absent, RS 11-25   | 1.307 | (1.086, 1.572) |         |
| Present vs. absent, RS 26-100  | 1.583 | (1.302, 1.925) |         |
| Unknown vs absent, RS 0-10     | 1.136 | (0.836, 1.543) |         |
| Unknown vs absent, RS 11-25    | 1.050 | (0.869, 1.269) |         |
| Unknown vs absent, RS 26-100   | 1.153 | (0.898, 1.480) |         |
| RS                             |       |                | <0.0001 |
| 11-25 vs 0-10 in LVI absent    | 1.072 | (0.942, 1.221) |         |
| 26-100 vs 0-10 in LVI absent   | 1.928 | (1.621, 2.295) |         |
| 11-25 vs 0-10 in LVI present   | 1.287 | (0.893, 1.855) |         |
| 26-100 vs 0-10 in LVI present  | 2.804 | (1.922, 4.092) |         |
| 11-25 vs 0-10 in LVI unknown   | 0.991 | (0.708, 1.389) |         |
| 26-100 vs 0-10 in LVI unknown  | 1.958 | (1.338, 2.866) |         |
| Interaction between LVI and RS |       |                | 0.352   |

Supplemental Table 3

Interaction between LVI and chemotherapy in node negative patients with RS=11-25

(n=39402, number of deaths 1138)

|                                           | HR    | 95% CI         | p-value |
|-------------------------------------------|-------|----------------|---------|
| LVI                                       |       |                | 0.025   |
| Present vs. absent, no chemotherapy       | 1.331 | (1.082, 1.638) |         |
| Present vs. absent, received chemotherapy | 1.234 | (0.813, 1.875) |         |
| Unknown vs absent, no chemotherapy        | 0.999 | (0.810, 1.233) |         |
| Unknown vs absent, received chemotherapy  | 1.330 | (0.852, 2.076) |         |
| Chemotherapy                              |       |                | 0.904   |
| Yes vs no in LVI absent                   | 0.988 | (0.813, 1.201) |         |
| Yes vs no in LVI present                  | 0.916 | (0.598, 1.403) |         |
| Yes vs no in LVI unknown                  | 1.315 | (0.834, 2.074) |         |
| Interaction between LVI and chemotherapy  |       |                | 0.46    |

Supplemental Table 4

## Comparison of Characteristics of Patients in Whom RS Was vs. Was Not Evaluated

| Characteristic              | Number (%)<br>RS done<br>(n=77,425) | Number (%)<br>RS not done<br>(n=119,321) | P value |
|-----------------------------|-------------------------------------|------------------------------------------|---------|
| Age (median, IQR)           | 59 (50-65)                          | 61 (52-68)                               | <0.0001 |
| Race                        |                                     |                                          | <0.0001 |
| White                       | 67,998 (87.8%)                      | 102,395 (85.8%)                          |         |
| Black                       | 5750 (7.4%)                         | 10938 (9.2%)                             |         |
| Other                       | 3096 (4.0%)                         | 5034 (4.2%)                              |         |
| Unknown                     | 581 (0.8%)                          | 954 (0.8%)                               |         |
| LVI                         |                                     |                                          | <0.0001 |
| Present                     | 9856 (12.7%)                        | 16,969 (14.2%)                           |         |
| Absent                      | 59,305 (76.6%)                      | 87,875 (73.6%)                           |         |
| Unknown                     | 8264 (10.7%)                        | 14,477 (12.1%)                           |         |
| Tumor size (mm)             |                                     |                                          | <0.0001 |
| 0-20                        | 59,396 (76.7%)                      | 90,222 (75.6%)                           |         |
| 21-50                       | 18,029 (23.3%)                      | 29,099 (24.4%)                           |         |
| Lymph node involvement      |                                     |                                          | <0.0001 |
| 0                           | 65,018 (84.0%)                      | 87,088 (73.0%)                           |         |
| 1-3*                        | 12,407 (16.0%)                      | 32,233 (27.0%)                           |         |
| Grade                       |                                     |                                          | <0.0001 |
| 1                           | 21,069 (27.2%)                      | 38,976 (32.7%)                           |         |
| 2                           | 40,188 (51.9%)                      | 54,255 (45.5%)                           |         |
| 3                           | 12,077 (15.6%)                      | 19,162 (16.1%)                           |         |
| unknown                     | 4091 (5.3%)                         | 6928 (5.8%)                              |         |
| Recurrence Score            |                                     |                                          |         |
| 0-10                        | 17,390 (22.5%)                      | NA                                       |         |
| 11-25                       | 48,398 (62.5%)                      | NA                                       |         |
| 26-100                      | 11,637 (15.0%)                      | NA                                       |         |
| Charlson-Deyo Comorbidities |                                     |                                          | <0.0001 |
| 0                           | 65,906 (85.1%)                      | 98,980 (83.0%)                           |         |
| 1                           | 9761 (12.6%)                        | 16,554 (13.9%)                           |         |
| 2                           | 1433 (1.8%)                         | 2968 (2.5%)                              |         |
| 3 or more                   | 325 (0.4%)                          | 819 (0.7%)                               |         |
| Median income quartile      |                                     |                                          | <0.0001 |
| <\$38,000                   | 9001 (11.6%)                        | 17,044 (14.3%)                           |         |
| \$38,000 - \$47,999         | 15,080 (19.5%)                      | 25,247 (21.2%)                           |         |
| \$48,000 - \$62,999         | 21,028 (27.2%)                      | 31,898 (26.8%)                           |         |
| >\$63,000                   | 32,146 (41.6%)                      | 44,881 (37.7%)                           |         |
| Median educational level**  |                                     |                                          | <0.0001 |
| 1 (17.6% or more)           | 8222 (10.6%)                        | 16,282 (13.7%)                           |         |
| 2 (10.9% - 17.5%)           | 16,236 (21.0%)                      | 28,200 (23.7%)                           |         |
| 3 (6.3% - 10.8%)            | 26,636 (34.5%)                      | 39,607 (33.2%)                           |         |
| 4 (<6.3%)                   | 26,190 (33.9%)                      | 35,012 (29.4%)                           |         |

\* includes micrometastatic nodal involvement

\*\*% of adults &gt; age 25 in patients' zip code without high school diploma, expressed in quartiles

Supplemental Table 5

Multivariate analysis of characteristics associated with OS in patients who did not undergo genomic testing

|                             | Entire Cohort<br>(n=116,121; deaths=7725) |                |         | Node Negative<br>(n=84,531; deaths=5030) |                |         | Node Positive<br>(n=31,590; deaths=2695) |                |         |
|-----------------------------|-------------------------------------------|----------------|---------|------------------------------------------|----------------|---------|------------------------------------------|----------------|---------|
|                             | HR                                        | 95% CI         | P value | HR                                       | 95% CI         | P value | HR                                       | 95%CI          | P-value |
| LVI                         |                                           |                | <0.0001 |                                          |                | 0.026   |                                          |                | <0.0001 |
| Present vs. absent          | 1.208                                     | (1.134, 1.287) | <0.0001 | 1.150                                    | (1.036, 1.275) | <0.0001 | 1.219                                    | (1.122, 1.324) | <0.0001 |
| Unknown vs absent           | 1.003                                     | (0.935, 1.077) | 0.923   | 1.039                                    | (0.954, 1.132) | 0.383   | 0.946                                    | (0.836, 1.070) | 0.377   |
| Tumor size (T2 vs T1)       | 1.582                                     | (1.500, 1.667) | <0.0001 | 1.516                                    | (1.412, 1.628) | <0.0001 | 1.569                                    | (1.449, 1.698) | <0.0001 |
| Age at Diagnosis            | 1.046                                     | (1.043, 1.049) | <0.0001 | 1.058                                    | (1.054, 1.062) | <0.0001 | 1.030                                    | (1.025, 1.034) | <0.0001 |
| Race                        |                                           |                | <0.0001 |                                          |                | <0.0001 |                                          |                | <0.0001 |
| Black vs White              | 1.143                                     | (1.064, 1.227) | 0.0002  | 1.062                                    | (0.967, 1.166) | 0.210   | 1.258                                    | (1.127, 1.405) | <0.0001 |
| Other vs White              | 0.679                                     | (0.586, 0.787) | <0.0001 | 0.602                                    | (0.493, 0.735) | <0.0001 | 0.799                                    | (0.640, 0.997) | 0.047   |
| Chemotherapy (Yes vs No)    | 0.803                                     | (0.753, 0.856) | <0.0001 | 1.045                                    | (1.052, 1.245) | 0.002   | 0.719                                    | (0.592, 0.872) | <0.0001 |
| Grade                       |                                           |                | <0.0001 |                                          |                | <0.0001 |                                          |                | <0.0001 |
| 2 vs 1                      | 1.177                                     | (1.112, 1.246) | <0.0001 | 1.146                                    | (1.074, 1.224) | <0.0001 | 1.265                                    | (1.122, 1.426) | <0.0001 |
| 3 vs 1                      | 1.880                                     | (1.754,2.016)  | <0.0001 | 1.621                                    | (1.482, 1.772) | <0.0001 | 2.205                                    | (1.941, 2.505) | <0.0001 |
| unknown vs 1                | 1.314                                     | (1.181,1.461)  | <0.0001 | 1.248                                    | (1.100, 1.417) | 0.0001  | 1.489                                    | (1.218, 1.819) | <0.0001 |
| Node involvement (N1 vs N0) | 1.410                                     | (1.327,1.497)  | <0.0001 | NA                                       | NA             | NA      | NA                                       | NA             | NA      |
| Comorbidity                 |                                           |                | <0.0001 |                                          |                | <0.0001 |                                          |                | <0.0001 |
| 1 vs 0                      | 1.686                                     | (1.595,1.782)  | <0.0001 | 1.793                                    | (1.676, 1.918) | <0.0001 | 1.521                                    | (1.381, 1.675) | <0.0001 |
| 2 vs 0                      | 2.970                                     | (2.718,3.245)  | <0.0001 | 3.393                                    | (3.053, 3.771) | <0.0001 | 2.240                                    | (1.902, 2.638) | <0.0001 |
| 3 or more vs 0              | 4.501                                     | (3.936,5.147)  | <0.0001 | 5.204                                    | (4.437, 6.103) | <0.0001 | 3.314                                    | (2.586, 4.247) | <0.0001 |
